# Supplementary material for: Loss of a Fragile Chromosome Region leads to the Screwy Phenotype in Paramecium tetraurelia
Source: MDPI journal article supplement (doi:10.3390/genes10070513), 2019-07-06
Supplement: s1 [file s1]

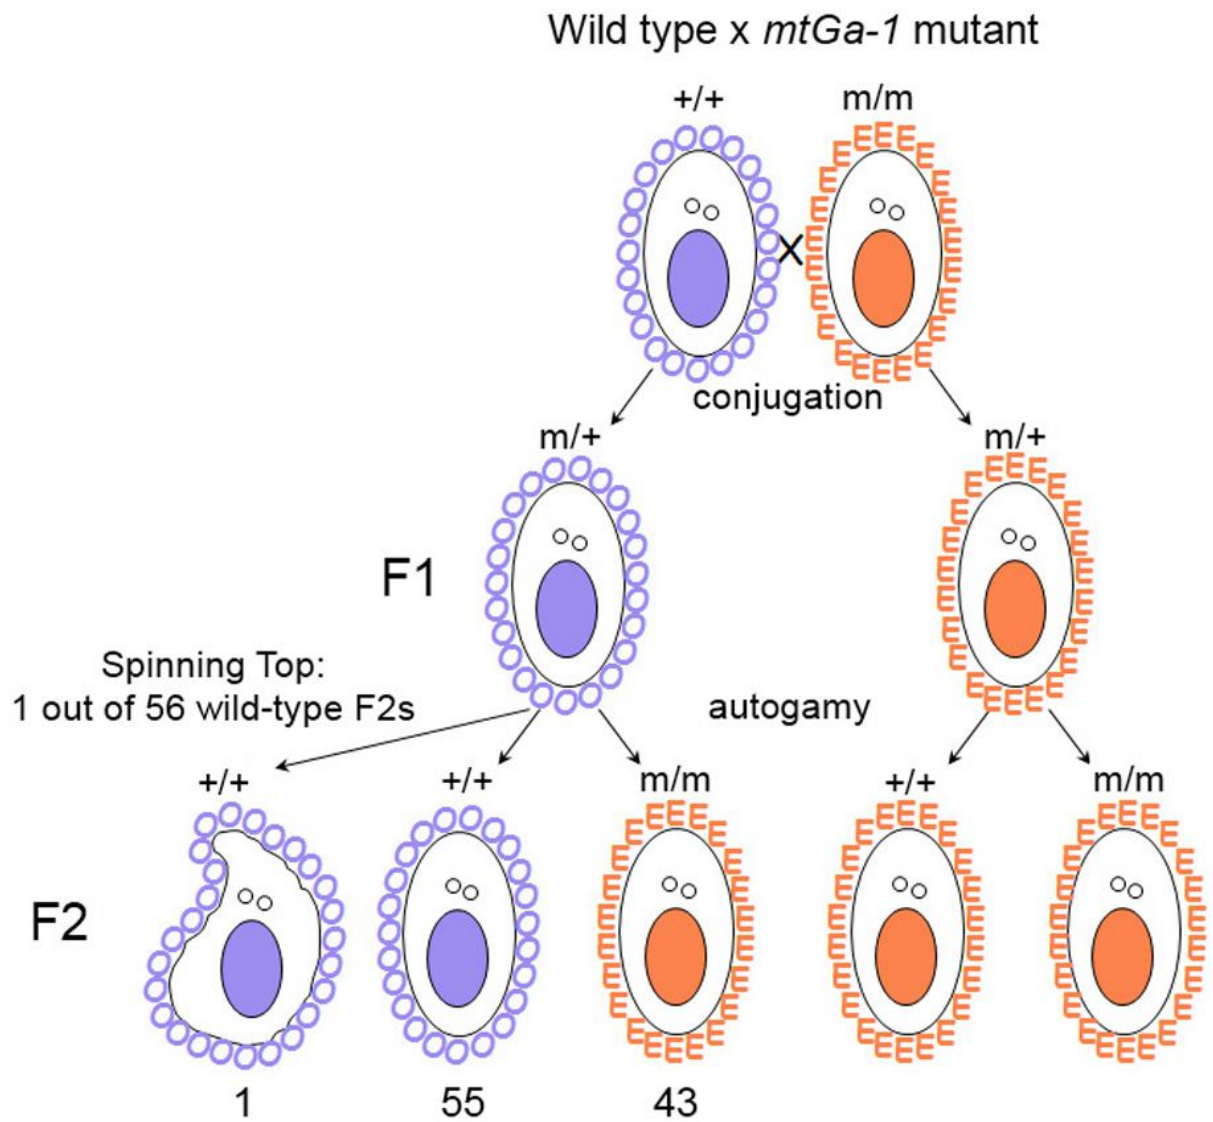

**Supplementary Figure 1.** The origin of the Spinning Top mutant (+ is wild type allele, **m** is a mutant allele of the *mtG* gene; see [4]).

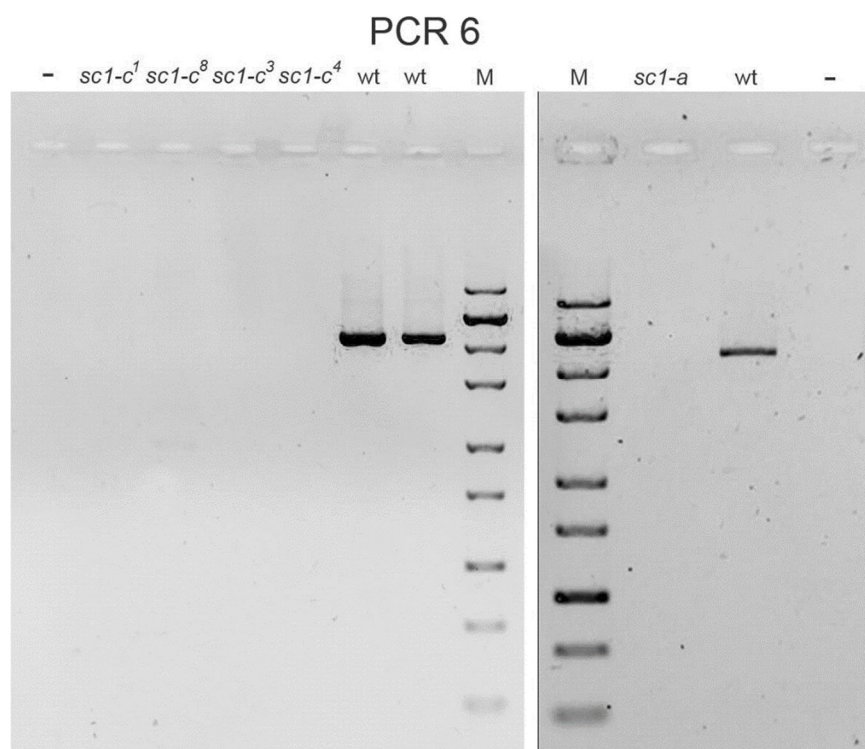

**Supplementary Figure 2.** PCR results demonstrating absence of the *Spade* gene in screwy mutants. The gene is present only in wild type cells (wt). “-” stands for negative control. For the primers used see Supplementary Table 1.

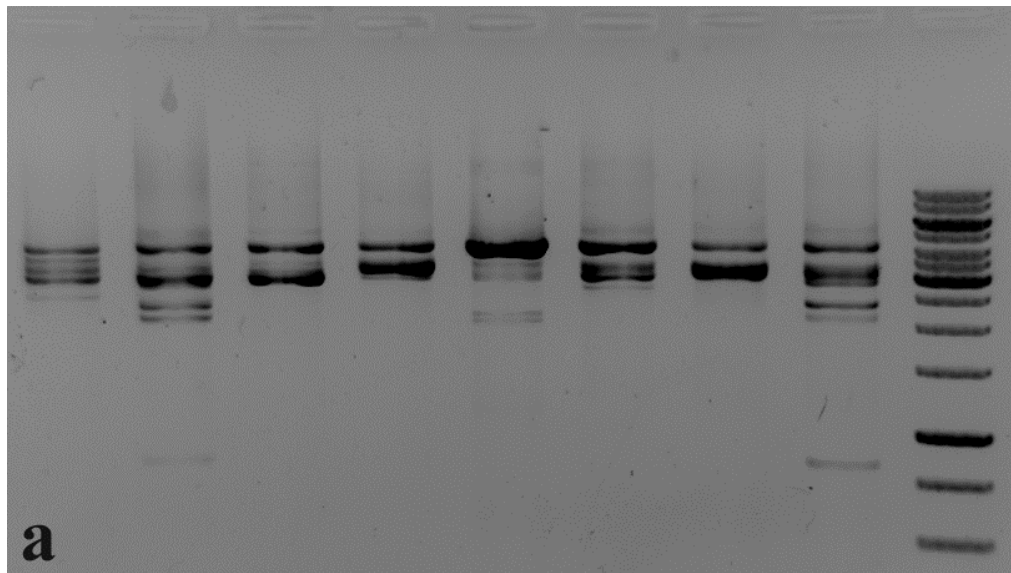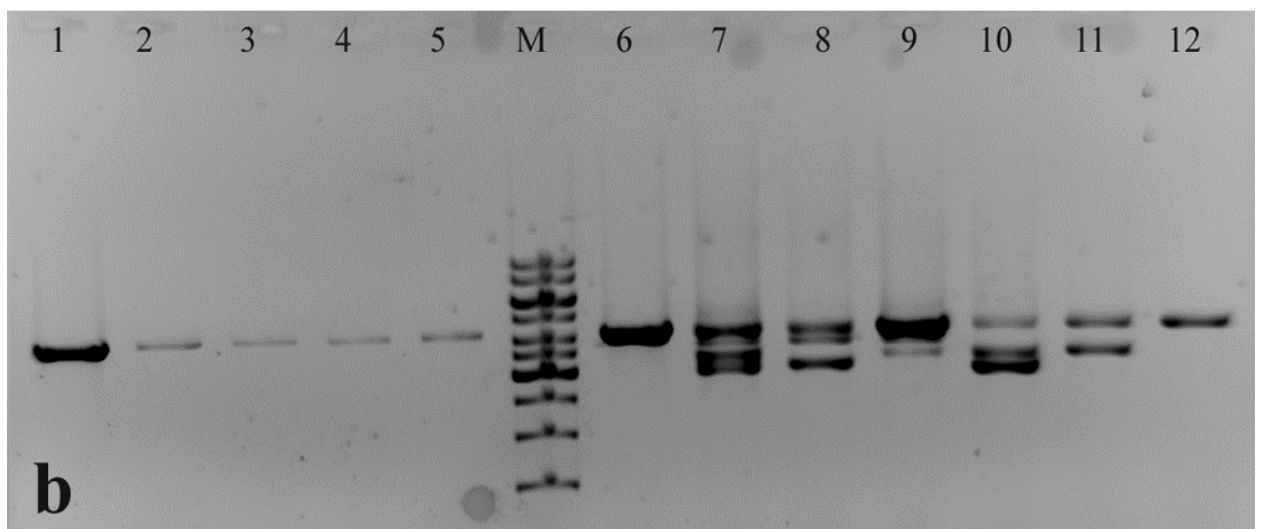

**Supplementary Figure 3.** (a) Results of PCR demonstrating various deletions in the *Spinning Top* locus induced by dsRNA feeding with the *Spade* gene fragment in autogamy. The fragment was the same as used for the *Spade* gene silencing. Deletions were detected by PCR using primers SPaD1 and SPaD2. (b) Results of PCR demonstrating that induced deletions can be inherited as epimutations through autogamy in lines of selected feeding-induced screwy cells (lanes 6-12, right to the marker, M). No deletions are present in lines obtained from phenotypically wild type cells from the same stocks (lanes 1-5). In some selected "screwy" lines deletions also disappear, and wild phenotype recovers (lanes 6, 12).

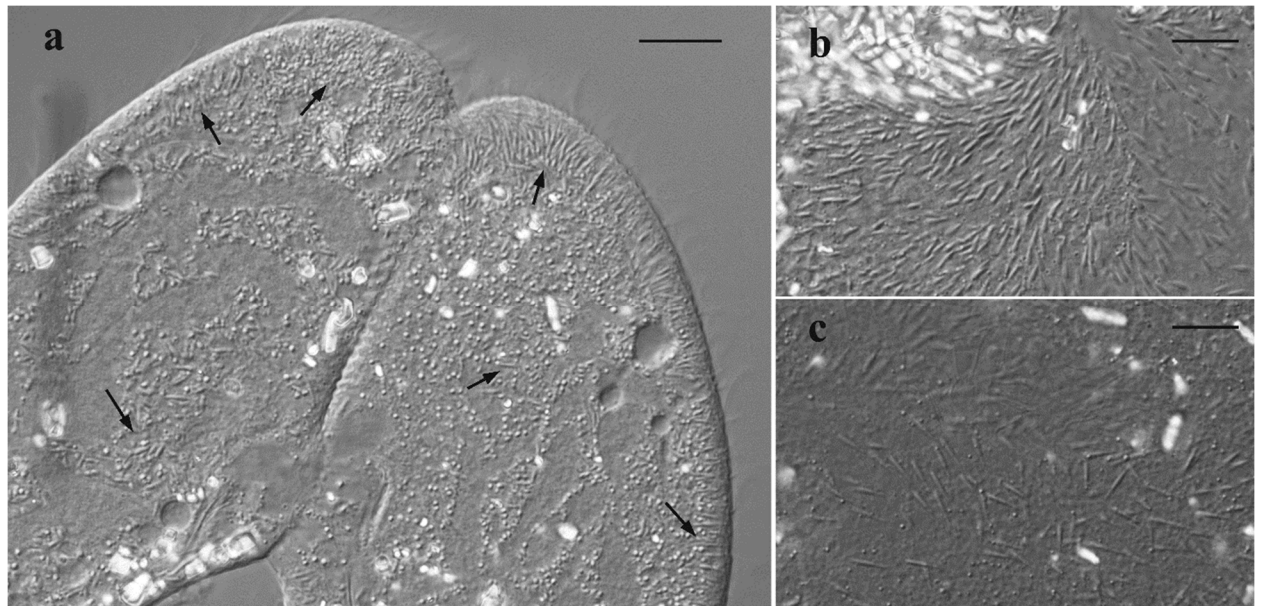

**Supplementary Figure 4.** Shape of trichocysts in *P. tetraurelia* wild type and *scl-c<sup>3</sup>* mutant cells. DIC microscopy. **(a)** Conjugating couple of wild type (left) and mutant (right) cells. Well-visible trichocysts are marked with the arrows. Scale bar is 5 μm. **(b)** Carrot-shaped (normal) trichocysts of the wild type cell. **(c)** Cigar-shaped (aberrant) trichocysts of the *scl-c<sup>3</sup>* mutant cell. Scale bar is 12 μm.

**Supplementary Table 1.** Primers used for preparation of the feeding inserts.

| Target gene                              | Gene index [9]     | Primer index | Sequence                            |
|------------------------------------------|--------------------|--------------|-------------------------------------|
| «copine»                                 | PTET.51.1.G0770200 | Copine F     | AGATGGATGGAATTATGCAAGCC             |
|                                          |                    | Copine R     | CTCCTTCCAAAGGAATCATGTAGAT           |
| <i>Spade</i>                             | PTET.51.1.G0770206 | fSpAD-F      | TAATGGTACCTATTGAGCAGGAGGTTATTGT     |
|                                          |                    | SpAD-R       | GTACAACCCTGTCAAACCTTAAAC            |
| “NimA”                                   | PTET.51.1.G0770208 | NIMA-F       | CCACAGAGATATTAAGCCAGCC              |
|                                          |                    | fNIMA-R      | TTAAAGATCTGGCATTGGTCTTGCTTCAG       |
| <i>Spade</i> WGD2<br>ohnolog scaffold 81 | PTET.51.1.G0810029 | SpAD81-F     | TTTTGGTACCTATTAAACTGGAGCCTATTATTTAC |
|                                          |                    | SpAD81-R     | ACCCAGATCTCCTATAAGATAGAC            |
| <i>Spade</i> WGD2<br>ohnolog scaffold 94 | PTET.51.1.G0940176 | SpAD94-F     | AACCGGTACCAAAAACCGCAACACAGTC        |
|                                          |                    | SpAD94-R     | GGGTAGATCTCCACACCCTTCTGTA           |

**Supplementary Table 2.** Primers used for chromosome walking and for MIC-specific PCRs (see Fig. 2 for locations of the primers and for PCR design).

| PCR                                               | Forward primer |                                 | Reverse primer |                               |
|---------------------------------------------------|----------------|---------------------------------|----------------|-------------------------------|
|                                                   | Index          | Sequence                        | Index          | Sequence                      |
| PCR1                                              | 61F            | GGAAGTGCCGAACTACACTAGC          | 61R            | GATTTCAGAGCTTCTGTAATCCC       |
| PCR2                                              |                |                                 | 59-r3          | CATAATTCAATAGGATTTCTCCAACAGAC |
| PCR3                                              | BP77F          | ATACTGATTTTCGATTGTGATGTGACATTTG | 77BPD1         | GTACATAGGGAGGAGGTTACTTTGC     |
| PCR4                                              | SPaD1          | TACATCGGACAATAGTGAGTCCTATAA     | Sp-r1          | CAACATATCCACCTGGACCACC        |
| PCR5                                              |                |                                 | IES 30-R       | GAGTGATCCAACCTATATCACCTTTCTTC |
| PCR6                                              |                |                                 | SPaD-r         | GTACAACCCTGTCAAACCTTAAAC      |
| MIC-PCR                                           |                |                                 | MICsp1-28R     | TATATAGTTAAGCAACCCACAAAGAG    |
| Induced deletions check<br>(not shown in Fig. 2)  |                |                                 | SPaD2          | TTTCGAACTGTGGATCTTGATCATTC    |
| PCR7                                              | NIMA-1         | TGCATTACCAAGCTCACTCGTC          | NIMA-2         | ACTTTCTAGCAAATAGGAACGGATCA    |
| MIC-PCR positive control<br>(not shown in Fig. 2) | 77mic-fl       | CCCCATCAAACCAGATAGTGCC          | 77mic-r1       | GAATCGAGAACCGCACTCTACC        |

**Supplementary Table 3.** Genes from the MAC scaffold51\_77 segment deleted in the Spinning Top mutant.

|    | Gene index         | Length  | WGD1<br>ohnolog | Putative description and molecular function (according<br>to [9])                      | Possible function (according to [9])                                   |
|----|--------------------|---------|-----------------|----------------------------------------------------------------------------------------|------------------------------------------------------------------------|
| 1  | PTET.51.1.G0770199 | 863 bp  | Yes             | Cytochrome b5-like Heme/Steroid binding domain                                         | heme binding                                                           |
| 2  | PTET.51.1.G0770200 | 2402 bp | Yes             | C2 domain; Copine                                                                      | Copine                                                                 |
| 3  | PTET.51.1.G0770201 | 1642 bp | Yes             | Coiled coil domain                                                                     | putative transmembrane protein                                         |
| 4  | PTET.51.1.G0770202 | 1237 bp | No              | Coiled coil domain                                                                     | putative metallo-beta-lactamase protein                                |
| 5  | PTET.51.1.G0770203 | 982 bp  | Yes             | Aquaporin-like, membrane transporter                                                   | Major intrinsic protein (MIP)<br>superfamily, aquaporin                |
| 6  | PTET.51.1.G0770204 | 2553 bp | Yes             | Cyclic nucleotide-binding-like, zinc ion binding, nucleic<br>acid binding              | Cyclic nucleotide-gated cation channel                                 |
| 7  | PTET.51.1.G0770205 | 1583 bp | Yes             | Pyridine nucleotide disulphide reductase class-I signature,<br>oxidoreductase activity | Oxidation-reduction process, cell redox<br>homeostasis                 |
| 8  | PTET.51.1.G0770206 | 1818 bp | No              | Coiled coil domain, zinc-finger of a C2HC-type                                         | Transcription factor                                                   |
| 9  | PTET.51.1.G0770207 | 1758 bp | No              | Protein kinase-like domain, ATP binding, calcium ion<br>binding                        | calcium-dependent protein kinase                                       |
| 10 | PTET.51.1.G0770208 | 1729 bp | No              | Protein kinase-like domain, ATP binding                                                | Protein kinase, Nek family                                             |
| 11 | PTET.51.1.G0770209 | 891 bp  | No              | Nucleotidyltransferase family                                                          | protein phosphatase                                                    |
| 12 | PTET.51.1.G0770210 | 1038 bp | No              | Mitochondrial substrate/solute carrier                                                 | Mitochondrial substrate carrier protein,<br>inner membrane transporter |
| 13 | PTET.51.1.G0770211 | 616 bp  | Yes             | Small GTPase Rab1 family profile                                                       | small GTPase, Rab type                                                 |
| 14 | PTET.51.1.G0770212 | 1064 bp | Yes             | Translation initiation factor 2, alpha subunit, RNA<br>binding                         | Eukaryotic translation initiation factor 2<br>subunit 1                |
| 15 | PTET.51.1.G0770213 | 1281 bp | No              | Heat shock transcription factor family, sequence-specific<br>DNA binding               | DNA-templated transcription regulator                                  |
| 16 | PTET.51.1.G0770214 | 968 bp  | No              | Not annotated                                                                          | Not annotated                                                          |
| 17 | PTET.51.1.G0770215 | 335 bp  | No              | Hypothetical protein                                                                   | Not annotated                                                          |
| 18 | PTET.51.1.G0770216 | 705 bp  | No              | Transmembrane domains                                                                  | Not annotated                                                          |
